1 **TITLE PAGE**

2

3 **1. Title**

4 - Machine Learning Classifier Models for Predicting Sarcopenia in the Elderly Based on Physical  
5 Factors

6

7 **2. Running head**

8 - Machine Learning Models for Sarcopenia

9

10 **3. Author names and academic degree of each author**

11 Jun-hee Kim (JH Kim), PhD, PT<sup>a</sup>

12 ([move@yonsei.ac.kr](mailto:move@yonsei.ac.kr))

13

14 **4. All authors' institutional affiliations**

15 <sup>a</sup>1, Yeonsedae-gil, Maeji-ri, Heungeop-myeon, Wonju-si, Gangwon-do, 26493, Department of  
16 Physical Therapy, College of Software and Digital Healthcare Convergence, Yonsei University,  
17 Wonju, South Korea.

18

19 **5. Corresponding author:**

20 Jun-hee Kim (JH Kim), PhD, PT

21 Address: 1, Yeonsedae-gil, Maeji-ri, Heungeop-myeon, Wonju-si, Gangwon-do, 26493, Department  
22 of Physical Therapy, College of Software and Digital Healthcare Convergence, Yonsei University,  
23 Wonju, South Korea.

24 TEL: +82-33-760-2403 / FAX: +82-33-760-2919 / E-mail: [move@yonsei.ac.kr](mailto:move@yonsei.ac.kr)

25

26

## ABSTRACT

27

28 **Background:** As the elderly population gradually increases, musculoskeletal disorders such as  
29 sarcopenia are increasing. Diagnostic techniques such as X-ray, CT, and MRI imaging are used to  
30 predict and diagnose sarcopenia, and methods using machine learning are gradually increasing.

31 **Purpose:** The purpose of this study was to create a model that can predict sarcopenia using physical  
32 characteristics and activity-related variables without medical diagnostic equipment such as imaging  
33 equipment for the elderly aged 60 years or older.

34 **Method:** A sarcopenia prediction model was constructed using public data obtained from the Korea  
35 National Health and Nutrition Examination Survey. Models were built using the multi-layer  
36 perceptron, XGBoost, LightGBM, and RandomForest algorithms, and the feature importance of the  
37 model with the highest accuracy was analyzed through evaluation metrics.

38 **Result:** The sarcopenia prediction model built with the LightGBM algorithm showed the highest test  
39 accuracy at 0.852. In constructing the LightGBM model, physical characteristics variables such as  
40 BMI showed high importance, and activity-related variables were also used in constructing the model.

41 **Conclusion:** The sarcopenia prediction model composed only of physical characteristics and activity-  
42 related factors showed excellent performance, and the use of this model will help predict sarcopenia  
43 in the elderly living in communities with insufficient medical resources or difficult access to medical  
44 facilities.

45

46 **Keywords:** Sarcopenia, predictive model, machine learning, physical characteristics, physical activity

47

48

## 49 I. INTRODUCTION

50 A decrease in skeletal muscle and consequent decrease in muscle strength can be seen as a  
51 representative physical change in the elderly.(1) The amount of skeletal muscle decreases by about 8%  
52 every 10 years (annual average of 0.8%) from the age of 40, and after the age of 70, more rapid  
53 muscle loss occurs, and it appears to decrease by about 15% for 10 years.(1) As such, rapid changes in  
54 body composition and body functions, such as muscle loss due to aging, can be defined as  
55 sarcopenia.(1) The prevalence of sarcopenia shows a tendency to gradually increase with increasing  
56 age.(2) In Korea, 13.0% of males and 21.7% of females in the middle-aged (40 to 59 years) had  
57 sarcopenia, and 21.6% of males and 30.7% of females in the elderly (60 or older) had sarcopenia.(2)

58 The clinical significance of sarcopenia can be summarized as a decrease in muscle strength due to a  
59 decrease in muscle mass, and an accompanying increase in physical disability and mortality.  
60 Sarcopenia has been reported to be closely related to physical dysfunction, and in particular, problems  
61 such as decreased gait function or increased risk of falling have been reported.(3,4) In addition,  
62 sarcopenia was often accompanied by diseases such as metabolic dysfunction or geriatric chronic  
63 diseases, and was also considered to be the cause of these diseases.(5,6) Therefore, sarcopenia due to  
64 aging directly causes muscle strength deterioration, leading to deterioration of physical function, and  
65 may cause or accompany chronic disabilities, and may increase the risk of death in the elderly.(7)

66 According to the definition of sarcopenia, measurement of absolute muscle mass is the best  
67 assessment indicator for diagnosing sarcopenia.(8) Therefore, examination using imaging measures  
68 such as MRI or CT to measure absolute muscle mass is currently considered the gold standard for  
69 diagnosing sarcopenia.(9) These two imaging techniques show the highest accuracy and  
70 reproducibility, and based on high image resolution, it is possible to selectively measure only muscles  
71 excluding fat among tissues composing the body.(10) However, imaging using MRI or CT is  
72 expensive and requires skilled operator experience and skill.(10) In addition, patients require high  
73 compliance with MRI or CT imaging, and in the case of CT, patients may be exposed to high levels of  
74 radiation.(10) For this reason, in clinical practice, sarcopenia is diagnosed using dual-energy X-ray

75 absorptiometry (DXA), which has a low radiation exposure and is relatively easy to measure.(9,10)  
76 DXA can measure body composition by classifying it into bone mineral content, body fat mass, and  
77 lean body mass, and can measure it separately for each limb and trunk.(10) The sum of the muscle  
78 mass excluding the bone mineral mass from the lean body mass of both limbs is called the  
79 appendicular skeletal muscle mass (ASM) and is used as a major indicator in the diagnosis of  
80 sarcopenia.(11) If even these diagnostic methods are difficult to apply, sarcopenia can be diagnosed  
81 with bioelectrical impedance analysis (BIA).(12) In addition to diagnosing sarcopenia using these  
82 devices, attempts have been made to prevent or improve sarcopenia by more simply and easily  
83 diagnosing sarcopenia through functional tests such as grip strength and walking speed.(13,14)  
84 However, studies diagnosing sarcopenia using simple functional tests, such as grip strength, appear  
85 differently depending on the race of subjects, or the methods of measuring functional factors used in  
86 studies have not yet been standardized or consistent.(15,16)

87 Recently, to overcome the limitations of assessments for diagnosing sarcopenia, methods for  
88 diagnosis through models using machine learning have been studied and presented. Machine learning  
89 is a technique that can predict a specific value or classification by using a large amount of data  
90 containing various variables.(17) A machine learning model that diagnoses image data through  
91 clinical measurement equipment instead of an expert is being built to improve the accuracy of  
92 diagnosing sarcopenia, and it is also possible to predict sarcopenia using imaging data from abdomen  
93 or chest rather than limbs.(18–20) In addition, it is possible to diagnose sarcopenia or predict the risk  
94 by modeling variables that can be related, such as physical characteristics, nutrition, and blood-related  
95 variables, using machine learning, rather than analyzing only a few variables such as muscle strength  
96 or walking speed.(21,22) These studies suggested that the prediction of sarcopenia using a machine  
97 learning model would be more efficient in terms of time and cost than the traditional method of  
98 diagnosing sarcopenia using imaging measurements.(19,21)

99 Although these predictors are said to be efficient in terms of time and cost, to measure these  
100 variables, medical devices or precise examinations by experts are required. This suggests that it may

101 be difficult to perform assessments according to the elderly living in underdeveloped facilities with  
102 poor access to medical facilities or the rapidly growing elderly population.(8) Therefore, a model that  
103 can be used as a screening or predict the risk of sarcopenia before using medical equipment or  
104 performing a detailed examination by an expert to diagnose sarcopenia in the elderly will be needed.  
105 Such a model should be composed of variables that are related to sarcopenia and are easy to measure,  
106 such as physical characteristics and activities.(23,24)

107 Therefore, the purpose of this study was to create a predictive model for diagnosing sarcopenia  
108 based on easily measurable variables such as physical characteristics and activity-related variables. To  
109 build this predictive model, the following steps were required. First, it was to find out which variables  
110 are needed to build models among variables related to physical characteristics and activities. Second,  
111 it was to build several models with selected variables and improve performance through  
112 hyperparameter tuning. Third, it was to compare various models and select the model with the best  
113 performance among them. Fourth, it was to find out which variables had the highest importance in  
114 constructing the best performing model.

115

## 116 II. METHODS

### 117 1. Data Source

118 The flow of this research process is shown in Figure 1. Data from the Korea National Health and  
119 Nutrition Examination Survey (KNHANES) conducted by the Korea Disease Control and Prevention  
120 Agency from 2008 to 2011 were used in this study. A total of 37,753 samples were investigated during  
121 that period. Among the data samples, there were a total of 5,573 data samples with dual energy x-ray  
122 data, age 60 years or older, and no missing responses to physical characteristics and activity-related  
123 variables. Data samples used in the study were provided with permission from the Korea Disease  
124 Control and Prevention Agency as data with personal identification information deleted.

125

126 [Figure 1. Flowchart of the study]

127

### 128 2. Data Preprocessing

129 This study used variables reflecting physical characteristics such as age, sex, height, weight and  
130 BMI, and variables reflecting the degree of physical activity such as working hours or exercise  
131 participation time per week. Table 1 shows the variables and descriptions of the data samples used in  
132 this study. Categorical variables were quantified through LabelEncoder, and numerical variables were  
133 standardized using StandardScaler. To avoid overfitting and poor performance due to imbalanced data,  
134 SMOTE was used to randomly generate data samples to match the proportions between the data.  
135 LASSO algorithm was used to select features to use the multi-layer perceptron (MLP) model. And  
136 RFECV (Recursive Feature Elimination with Cross-Validation) was used for feature selection of  
137 XGBoost, LightGBM, and RandomForest models. Finally, before training the models, the entire  
138 dataset was divided into a training dataset and a test dataset at a ratio of 8:2.

139

140 [Table 1. Description of variables]

### 141 3. *Machine learning algorithms*

142 A sarcopenia prediction model was developed using four machine learning algorithms: MLP,  
143 XGBoost, LightGBM, and RandomForest. This study used a MLP model with one input layer, one  
144 output layer and five hidden layers with varying numbers of nodes. The ReLU activation function was  
145 used for the hidden layers, while the sigmoid activation function was used for the output layer.  
146 Dropout ratio and batch normalization were applied to prevent overfitting, and the Adam optimizer  
147 was used for gradient descent. The data was split with a 0.2 validation ratio, and EarlyStopping was  
148 used to terminate learning when the validation loss did not improve for 20 epochs. The other three  
149 models used the StratifiedKFold for cross-validation to ensure unbiased performance. This technique  
150 partitions the data into K folds and ensures that each fold contains approximately equal proportions of  
151 samples from each class. This allows the model to be trained and evaluated on a representative subset  
152 of the data to obtain a more accurate performance estimate. In this study, a 5-fold training data set was  
153 created for each model, and the model was built by repeating training and validation five times. The  
154 hyperparameters of each model were then tuned using the GridSearchCV technique.

155

### 156 4. *Model evaluation*

157 The model's performance was assessed by comparing its predicted and actual classes using a  
158 confusion matrix that includes TP (true positive), FP (false positive), FN (false negative), and TN  
159 (true negative) values, based on test data. The accuracy, precision, recall, and F1-score were  
160 calculated from the matrix to evaluate the models. In addition, models were compared using the ROC  
161 AUC curve. Through the feature importance of the model with the highest accuracy, important factors  
162 in generating the model were analyzed.

163

164

165 **III. RESULTS**

166 *1. Feature selection*

167 All the mean test scores of the models according to variable selection using RFECV and LASSO  
168 exceeded 0.75. The variables selected and excluded for each algorithm to build the predictive models  
169 for sarcopenia diagnosis, and the mean test scores are shown in Table 2.

170

171 *2. Model performance*

172 Figure 2 shows the confusion matrix created with test data to evaluate the performance of models  
173 built with MLP, XGBoost, LightGBM, and RandomForest. Based on confusion matrix, the MLP  
174 model showed the lowest performance with an accuracy of 0.79 when evaluated with test data. The  
175 model with the highest performance was the model composed of the LightGBM algorithm. The test  
176 accuracy of this model was 0.852, showing slightly higher performance than models using XGBoost  
177 and RandomForest algorithms. Table 2 shows the accuracy, precision, recall, and F1-score of the  
178 models using the multi-layer perceptron, XGBoost, LightGBM, and RandomForest algorithms. The  
179 models compared through the ROC-AUC curve showed similar high performance except for the MLP  
180 model (Figure 2).

181 [Table 2. Feature selection and model evaluation scores]

182 [Figure 2. Confusion matrix and ROC-AUC curve of sarcopenia prediction model]

183

184



### 185 3. Feature importance

186 The variable with the highest importance in constructing the LightGBM model in predicting  
187 sarcopenia was BMI (Figure 3). In addition, variables related to individual physical characteristics  
188 such as age, waist circumference, height, and weight were found to be important variables in  
189 constructing a sarcopenia prediction model. EQ-5D, which represents health-related quality of life,  
190 was found to be an important variable in model construction next to variables representing individual  
191 physical characteristics, and variables such as the number of hours of work participation per week  
192 were the next most important variables, followed by the number of days of participation in walking or  
193 moderate- and high-intensity exercise. Gender appeared to be the least important variable in  
194 constructing the sarcopenia prediction model.

195

196 [Figure 3. Feature importance of LightGBM model]

197

## 198 **IV. DISCUSSION**

199 The purpose of this study was to create a model to predict the diagnosis of sarcopenia in the elderly  
200 with relatively easy-to-obtain physical characteristics and activity-related variables compared to  
201 variables measured by experts with medical equipment such as DXA to measure lean muscle mass.  
202 The sarcopenia prediction model constructed in this study showed an accuracy performance of about  
203 85% or more, except for the MLP model. In constructing a high-performance model, variables related  
204 to individual physical characteristics such as BMI and age were the most important, followed by  
205 variables related to exercise participation or occupational activity.

206 The machine learning model built with the data measured by the diagnostic imaging equipment  
207 showed a relatively high level of accuracy. Burns al. (2020) built a machine learning model to predict  
208 sarcopenia using abdominal cross-sectional CT taken at the lumbar level of an elderly person, and the  
209 accuracy (expressed as AUC score) of this model was around 94%. (19) Ryu et al. (2022) built a

210 model to predict the prevalence of sarcopenia using chest X-ray data in a simpler way than CT scan,  
211 and the accuracy (expressed as AUC score)of this model was 74-88%.(20) In addition, even when the  
212 machine learning model was constructed with variables other than those measured by imaging  
213 equipment, it showed high performance in diagnosing sarcopenia. Ko et al. (2021) developed a model  
214 with 81-88% accuracy by analyzing patterns during timed-up-and-go (TUG) and 6-minute walk test  
215 (6mWT) by machine learning using an IMU sensor.(25) Kang et al. (2019) created a model to predict  
216 sarcopenia with 78-82% accuracy (expressed as AUC score) using physical variables such as BMI and  
217 age, blood-related variables such as red blood cell count and white blood cell count, and dietary  
218 variables such as fiber intake, fat intake, and protein intake.(21) Similarly, the AUC score of the  
219 sarcopenia prediction model using body characteristics and physical activity variables in this study  
220 was 87-93%. In addition, the accuracy reached about 85% for three of the four models. The  
221 performance of the sarcopenia prediction model generated through this study did not show  
222 outstanding performance compared to other models. Nevertheless, there are several advantages  
223 compared to sarcopenia predictive models in other studies. First, the variables used to build the model  
224 in this study were factors that did not require imaging techniques using expensive medical equipment  
225 such as X-ray, CT, and MRI. Second, the variables in this study did not require invasive testing for  
226 human specimens, such as blood-related factors or muscle biopsies. Third, the variables used in model  
227 construction were not variables that required high-level skills to measure or that had to be measured  
228 by experts. Considering these advantages, even if the examiners or investigators do not have high-  
229 level skills, they will be able to measure the data used in this model, and even the subjects will be able  
230 to measure themselves using scales or questionnaires. In addition, the subject can be remotely It may  
231 be possible to input data and remotely receive sarcopenia prediction results for these data.

232 Variables related to physical characteristics showed high importance in constructing the LGBM  
233 model, which showed the highest accuracy among the models in this study. BMI showed the highest  
234 feature importance, followed by age, waist circumference, height, and weight. In the case of  
235 sarcopenia in Asian elderly with diabetes, it was found that sarcopenia decreased significantly as BMI  
236 increased.(26) In addition, according to the model for predicting sarcopenia constructed with the

237 RandomForest algorithm by Kim et al (2019), BMI served as the first variable to classify the elderly  
238 over 60 as sarcopenia and normal.(27) According to the deep learning model built by Somasundaram  
239 et al (2022) for the diagnosis of sarcopenia in adolescents, the skeletal muscle area measured by  
240 abdominal CT at the L3 level, one of the markers of sarcopenia diagnosis, showed a high correlation  
241 (0.75-0.94) with weight, height, age, and BMI in adolescence.(28) Based on these studies, the model  
242 constructed in our study would also have shown high importance in constructing the model for  
243 physical characteristics variables. In addition, studies related to sarcopenia and quality of life have  
244 been conducted. According to the review article, 4 studies measuring quality of life with the Short-  
245 form General Health Survey (SF-36) and 2 studies using the EQ-5D instrument, Subjects with  
246 sarcopenia were found to have significantly higher rates of problems related to quality of life.(29) For  
247 this reason, in the model of this study, EQ-5D would have shown the highest importance next to  
248 physical characteristics. The feature importance of physical activity-related variables in the model  
249 created in this study was lower than that of physical characteristics or quality of life variables.  
250 Nevertheless, the importance of physical activity in preventing muscle loss has been emphasized.(30)  
251 There is also evidence that physical activity, a modifiable lifestyle behavior, can partially reverse age-  
252 related skeletal muscle dysfunction.(30,31) Therefore, variables related to physical activity can be  
253 used as predictive variables in constructing a sarcopenia prediction model even if the feature  
254 importance is not high.

255 There are several limitations in this study. First, the sarcopenia predictive model of this study was  
256 constructed using data of the elderly over 60 years of age, so the performance of this model cannot be  
257 guaranteed for predicting sarcopenia in adolescents or young people. Second, in constructing the  
258 predictive model in this study, the model may have been overfitted because upsampling was used to  
259 balance the number of sarcopenia and normal data. Third, according to the inherent characteristics of  
260 machine learning models, it was possible to infer the correlation of variables related to sarcopenia  
261 prediction by calculating the feature importance in model creation, but it was difficult to interpret it as  
262 a causal relationship. Future studies will need to build a model by additionally collecting data from  
263 various age groups, and additionally discover several variables that are expected to have a high impact

264 on sarcopenia and use them to construct a model. In addition, research to identify the causal  
265 relationship between variables representing high feature importance and sarcopenia through a  
266 machine learning model should be conducted.

267

## 268 **V. CONCLUSION**

269 In this study, a sarcopenia prediction model was created using physical characteristics and activity  
270 variables of sarcopenia and normal elderly over 60 years of age. The performance of the model  
271 showed an accuracy of about 85%, and physical characteristics variables such as BMI, age, height,  
272 and weight were found to be important in constructing this model. In addition, through feature  
273 importance, it was found that activity-related variables such as EQ-5D, occupational activity, and  
274 number of days participating in physical activity were also used to construct the model. Since this  
275 model was constructed using relatively easy-to-measure variables without using medical equipment, it  
276 will be able to help predict and prevent sarcopenia in the elderly in areas with insufficient medical  
277 resources or poor access to medical facilities.

278

279 **Conflicts of Interest Statement**

280 The author whose name is listed immediately below certifies that they have NO affiliations with or  
281 involvement in any organization or entity with any financial interest (such as honoraria; educational  
282 grants; participation in speakers' bureaus; membership, employment, consultancies, stock ownership,  
283 or other equity interest; and expert testimony or patent-licensing arrangements), or non-financial  
284 interest (such as personal or professional relationships, affiliations, knowledge, or beliefs) in the  
285 subject matter or materials discussed in this manuscript. I understand that the Corresponding Author is  
286 the sole contact for the Editorial process and is responsible for submissions of revisions and final  
287 approval of proofs.

288

289 Author name: Jun-hee Kim

290

291 **VI. References**

- 292 1. Mitchell WK, Williams J, Atherton P, Larvin M, Lund J, Narici M. Sarcopenia, dynapenia,  
293 and the impact of advancing age on human skeletal muscle size and strength; a quantitative  
294 review. *Front Physiol.* 2012;3:260.
- 295 2. Oh JM, Choi J-H, Lee YJ, Lee YR, Youn NH, Song HJ. Association between sarcopenia and  
296 health-related quality of life in Korean adults: based on the Fifth Korean National Health and  
297 Nutrition Examination Survey (2010-2011). *Korean J Fam Pract.* 2017;7(6):870–6.
- 298 3. Woo N, Kim SH. Sarcopenia influences fall-related injuries in community-dwelling older  
299 adults. *Geriatr Nurs (Minneap).* 2014;35(4):279–82.
- 300 4. Perez□Sousa MA, Venegas□Sanabria LC, Chavarro□Carvajal DA, Cano□Gutierrez CA,  
301 Izquierdo M, Correa□Bautista JE, et al. Gait speed as a mediator of the effect of sarcopenia on  
302 dependency in activities of daily living. *J Cachexia Sarcopenia Muscle.* 2019;10(5):1009–15.
- 303 5. Biolo G, Cederholm T, Muscaritoli M. Muscle contractile and metabolic dysfunction is a  
304 common feature of sarcopenia of aging and chronic diseases: from sarcopenic obesity to  
305 cachexia. *Clin Nutr.* 2014;33(5):737–48.
- 306 6. Lim H-S, Park Y-H, Suh K, Yoo MH, Park HK, Kim HJ, et al. Association between  
307 sarcopenia, sarcopenic obesity, and chronic disease in Korean elderly. *J Bone Metab.*  
308 2018;25(3):187.
- 309 7. Chang S, Lin P. Systematic literature review and meta□analysis of the association of  
310 sarcopenia with mortality. *Worldviews Evidence□Based Nurs.* 2016;13(2):153–62.
- 311 8. Beaudart C, Rizzoli R, Bruyère O, Reginster J-Y, Biver E. Sarcopenia: burden and challenges  
312 for public health. *Arch public Heal.* 2014;72(1):1–8.
- 313 9. Albano D, Messina C, Vitale J, Sconfienza LM. Imaging of sarcopenia: old evidence and new  
314 insights. *Eur Radiol.* 2020;30:2199–208.

- 315 10. Guglielmi G, Ponti F, Agostini M, Amadori M, Battista G, Bazzocchi A. The role of DXA in  
316 sarcopenia. *Aging Clin Exp Res*. 2016;28:1047–60.
- 317 11. Belarmino G, Gonzalez MC, Sala P, Torrinhas RS, Andraus W, D’Albuquerque LAC, et al.  
318 Diagnosing sarcopenia in male patients with cirrhosis by dual-energy X-ray absorptiometry  
319 estimates of appendicular skeletal muscle mass. *J Parenter Enter Nutr*. 2018;42(1):24–36.
- 320 12. Gonzalez MC, Barbosa-Silva TG, Heymsfield SB. Bioelectrical impedance analysis in the  
321 assessment of sarcopenia. *Curr Opin Clin Nutr Metab Care*. 2018;21(5):366–74.
- 322 13. Yuki A, Ando F, Shimokata H. Transdisciplinary approach for sarcopenia. Sarcopenia:  
323 definition and the criteria for Asian elderly people. *Clin Calcium*. 2014;24(10):1441–8.
- 324 14. Reijnierse EM, De Van Der Schueren MAE, Trappenburg MC, Doves M, Meskers CGM,  
325 Maier AB. Lack of knowledge and availability of diagnostic equipment could hinder the  
326 diagnosis of sarcopenia and its management. *PLoS One*. 2017;12(10):e0185837.
- 327 15. Ha Y-C, Hwang S-C, Song S-Y, Lee C, Park K-S, Yoo J-I. Hand grip strength measurement in  
328 different epidemiologic studies using various methods for diagnosis of sarcopenia: a  
329 systematic review. *Eur Geriatr Med*. 2018;9:277–88.
- 330 16. Cawthon PM, Trivison TG, Manini TM, Patel S, Pencina KM, Fielding RA, et al. Establishing  
331 the link between lean mass and grip strength cut points with mobility disability and other  
332 health outcomes: proceedings of the sarcopenia definition and outcomes consortium  
333 conference. *Journals Gerontol Ser A*. 2020;75(7):1317–23.
- 334 17. Jordan MI, Mitchell TM. Machine learning: Trends, perspectives, and prospects. *Science*.  
335 2015;349(6245):255–60.
- 336 18. Kim YJ. Machine learning models for sarcopenia identification based on radiomic features of  
337 muscles in computed tomography. *Int J Environ Res Public Health*. 2021;18(16):8710.
- 338 19. Burns JE, Yao J, Chalhoub D, Chen JJ, Summers RM. A machine learning algorithm to

- 339 estimate sarcopenia on abdominal CT. *Acad Radiol.* 2020;27(3):311–20.
- 340 20. Ryu J, Eom S, Kim HC, Kim CO, Rhee Y, You SC, et al. Chest X-ray based opportunistic  
341 screening of sarcopenia using deep learning. *J Cachexia Sarcopenia Muscle.* 2023;14(1):418–  
342 28.
- 343 21. Kang Y-J, Yoo J-I, Ha Y. Sarcopenia feature selection and risk prediction using machine  
344 learning: A cross-sectional study. *Medicine (Baltimore).* 2019;98(43).
- 345 22. Wu L-W, OuYoung T, Chiu Y-C, Hsieh H-F, Hsiu H. Discrimination between possible  
346 sarcopenia and metabolic syndrome using the arterial pulse spectrum and machine-learning  
347 analysis. *Sci Rep.* 2022;12(1):21452.
- 348 23. Beaudart C, Dawson A, Shaw SC, Harvey NC, Kanis JA, Binkley N, et al. Nutrition and  
349 physical activity in the prevention and treatment of sarcopenia: systematic review. *Osteoporos*  
350 *Int.* 2017;28:1817–33.
- 351 24. Kim KM, Jang HC, Lim S. Differences among skeletal muscle mass indices derived from  
352 height-, weight-, and body mass index-adjusted models in assessing sarcopenia. *Korean J*  
353 *Intern Med.* 2016;31(4):643.
- 354 25. Ko JB, Kim KB, Shin YS, Han H, Han SK, Jung DY, et al. Predicting Sarcopenia of Female  
355 Elderly from Physical Activity Performance Measurement Using Machine Learning Classifiers.  
356 *Clin Interv Aging.* 2021;1723–33.
- 357 26. Fukuoka Y, Narita T, Fujita H, Morii T, Sato T, Sassa MH, et al. Importance of physical  
358 evaluation using skeletal muscle mass index and body fat percentage to prevent sarcopenia in  
359 elderly Japanese diabetes patients. *J Diabetes Investig.* 2019;10(2):322–30.
- 360 27. Kim S, Yi C, Lim J. Risk Factors for Sarcopenia, Sarcopenic Obesity, and Sarcopenia Without  
361 Obesity in Older Adults. *Phys Ther Korea.* 2021;28(3):177–85.
- 362 28. Somasundaram E, Castiglione JA, Brady SL, Trout AT. Defining normal ranges of skeletal



- 363 muscle area and skeletal muscle index in children on CT using an automated deep learning  
364 pipeline: implications for sarcopenia diagnosis. *Am J Roentgenol.* 2022;219(2):326–36.
- 365 29. Tsekoura M, Kastrinis A, Katsoulaki M, Billis E, Gliatis J. Sarcopenia and its impact on  
366 quality of life. *GeNeDis 2016 Genet Neurodegener.* 2017;213–8.
- 367 30. Pillard F, Laoudj-Chenivesse D, Carnac G, Mercier J, Rami J, Rivière D, et al. Physical  
368 activity and sarcopenia. *Clin Geriatr Med.* 2011;27(3):449–70.
- 369 31. Bosaeus I, Rothenberg E. Nutrition and physical activity for the prevention and treatment of  
370 age-related sarcopenia. *Proc Nutr Soc.* 2016;75(2):174–80.
- 371

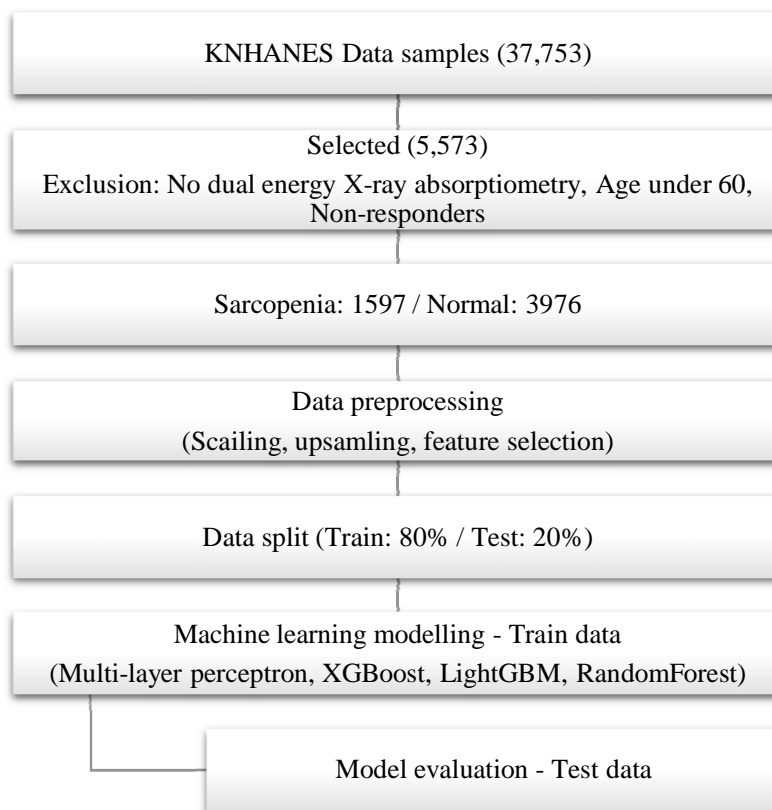

Figure 1. Flowchart of the study

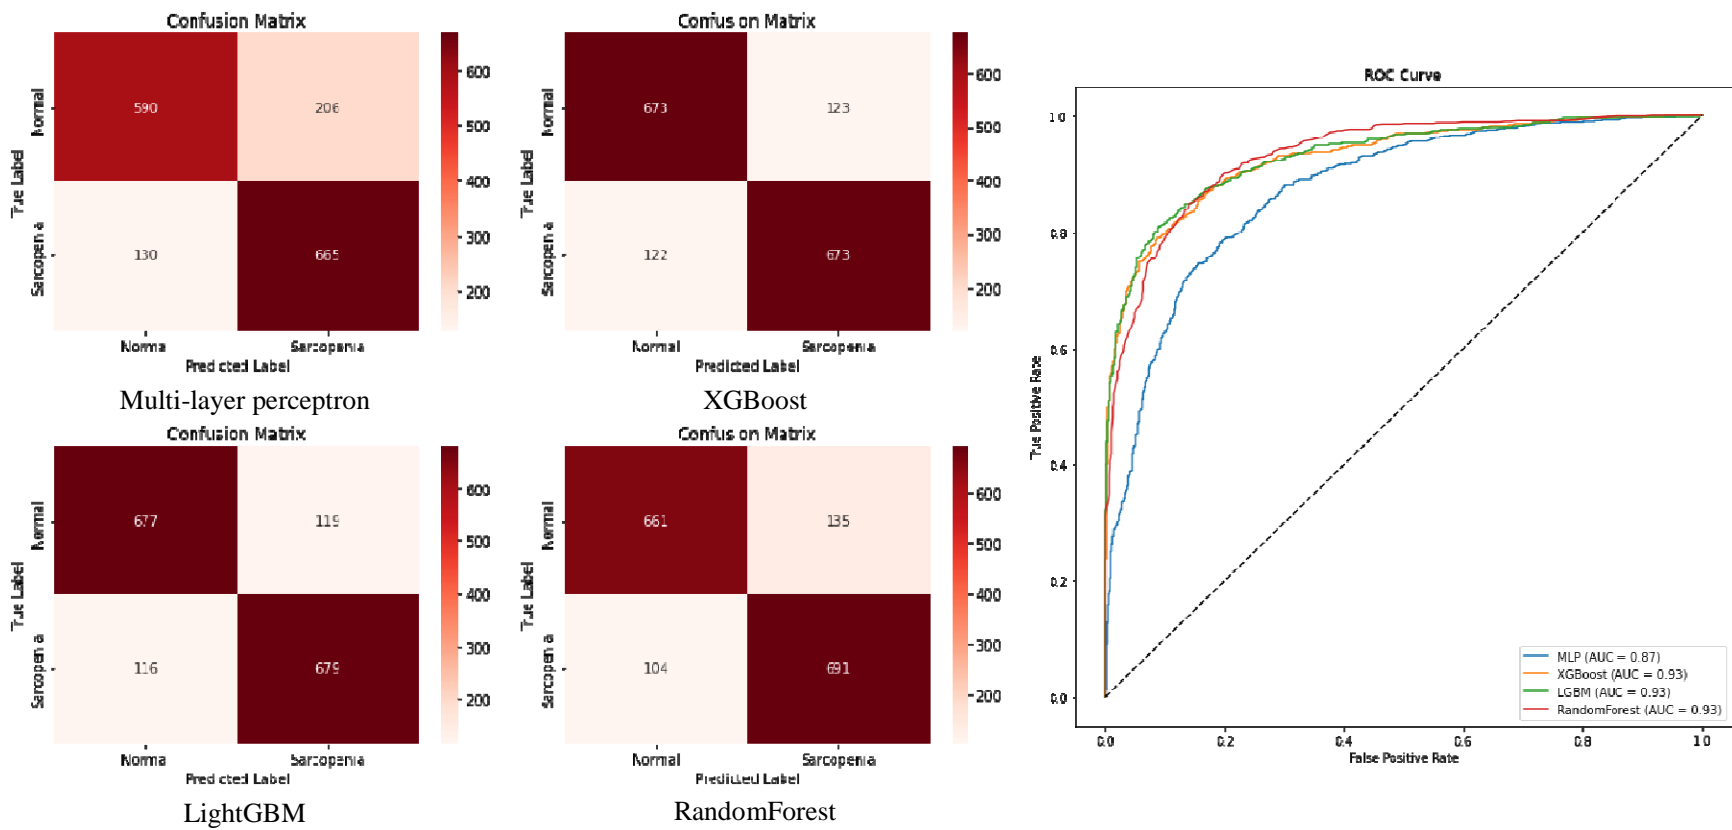

Figure 2. Confusion matrix and ROC-AUC curve of sarcopenia prediction model

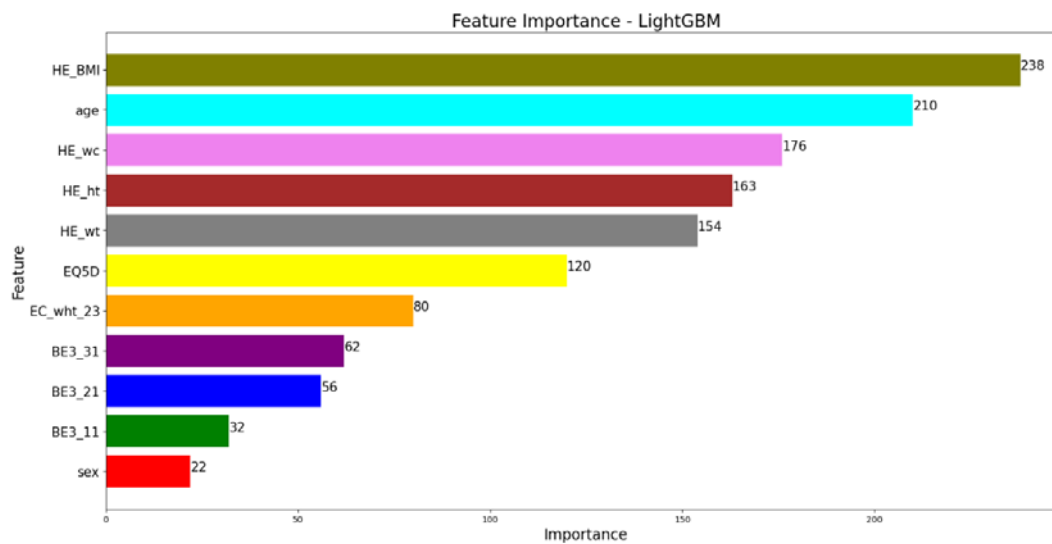

Figure 4. Feature importance of LightGBM model

Table 1. Description of variables

| <b>KNHANES</b> | <b>Description</b>                  | <b>Sarcopenia</b>   | <b>Normal</b>        |
|----------------|-------------------------------------|---------------------|----------------------|
| age            | Age                                 | 70.76 ± 6.17        | 68.54 ± 5.84         |
| sex            | Gender                              | M:941, F:656        | M:1467, F:2509       |
| HE_ht          | Height                              | 159.03 ± 8.85       | 157.03 ± 8.89        |
| HE_wt          | Weight                              | 54.09 ± 8.31        | 61.39 ± 9.95         |
| HE_wc          | Waist circumference                 | 78.88 ± 8.61        | 86.02 ± 8.87         |
| BMI            | Body mass index                     | 21.34 ± 2.41        | 24.81 ± 2.94         |
| BO1_1          | Weight change                       | N:1170, I:353, D:74 | N:2980, I:676, D:320 |
| EQ5D           | Quality of life                     | 0.86 ± 0.18         | 0.87 ± 0.17          |
| EC_wht_23      | Average working hours per week      | 16.45 ± 24.77       | 18.53 ± 25.5         |
| BE3_11         | Vigorous physical activity per week | 1.58 ± 1.63         | 1.76 ± 1.78          |
| BE3_21         | Moderate physical activity per week | 2.12 ± 2.17         | 2.56 ± 2.45          |
| BE3_31         | Walking days per week               | 5.33 ± 2.82         | 5.27 ± 2.79          |
| LQ4_00         | Activity restriction                | Y:537, N:1060       | Y:1217, N:2759       |
| EC1_1          | Occupational activity               | Y:605, N:992        | Y:1704, N:2272       |

\*M, male; F, female; Y, yes; N, no; I, increase; D, decrease

Table 2. Feature selection and model evaluation scores

|                               | Mean test score | Selected variables                                                                                        | Excluded variables          | Training Accuracy | Test Accuracy | Precision | Recall | F-1 score |
|-------------------------------|-----------------|-----------------------------------------------------------------------------------------------------------|-----------------------------|-------------------|---------------|-----------|--------|-----------|
| <b>Multi-layer Perceptron</b> | 0.773           | age, sex, LQ4_00, EQ5D, EC_wht_23, BE3_11, BE3_21, HE_wt, HE_wc, HE_BMI (10)                              | EC1_1, BO1_1, BE3_31, HE_ht | 0.793             | 0.789         | 0.763     | 0.836  | 0.798     |
| <b>XGBoost</b>                | 0.835           | age, sex, EQ5D, EC_wht_23, BO1_1, BE3_11, BE3_21, BE3_31, HE_wt, HE_wc, HE_BMI (11)                       | LQ4_00, EC1_1, HE_ht        | 0.851             | 0.846         | 0.845     | 0.847  | 0.846     |
| <b>LightGBM</b>               | 0.834           | age, sex, EQ5D, EC_wht_23, BE3_11, BE3_21, BE3_31, HE_ht, HE_wt, HE_wc, HE_BMI (11)                       | LQ4_00, EC1_1, BO1_1        | 0.850             | 0.852         | 0.851     | 0.854  | 0.852     |
| <b>RandomForest</b>           | 0.847           | age, sex, LQ4_00, EQ5D, EC1_1, EC_wht_23, BO1_1, BE3_11, BE3_21, BE3_31, HE_ht, HE_wt, HE_wc, HE_BMI (14) | -                           | 0.840             | 0.850         | 0.837     | 0.869  | 0.853     |
